# Supplementary material for: Values of Free Government: Our Bicentennial Legacy.
Source: MDPI journal article supplement (doi:10.3390/plants12223826), 1987-01-01
Supplement: s1 [file s1]

**Table S1.** Average agronomic performance of *OsCPK5\_E4* (GM) and BRSMG Curinga (NGM) rice plants: grain yield, number of filled grains, harvest index, tiller number, panicle number, flag leaf length and width, dry and fresh mass, in control and water deficit (WD) irrigation treatments.

| Trait                                | Genotype         | Control        | WD            |
|--------------------------------------|------------------|----------------|---------------|
| Grain yield (g plant <sup>-1</sup> ) | <i>OSCPK5_E2</i> | 73.8 (18.6) A  | 12.3 (10.2) B |
|                                      | <i>OSCPK5_E4</i> | 85.5 (20.3) A  | 30.9 (20.5) A |
|                                      | <i>OSCPK5_E7</i> | 74.8 (16.0) A  | 9.12 (10.9) B |
|                                      | NGM              | 87.1 (20.1) A  | 29.5 (21.0) A |
| Percentage of filled grains          | <i>OSCPK5_E2</i> | 88.8 (0.02) A  | 16.8 (0.1) B  |
|                                      | <i>OSCPK5_E4</i> | 88.3 (0.04) A  | 38.3 (0.2) A  |
|                                      | <i>OSCPK5_E7</i> | 87.5 (0.06) A  | 17.8 (0.1) B  |
|                                      | NGM              | 79.8 (0.05) A  | 37.3 (0.2) A  |
| Plant Height                         | <i>OSCPK5_E2</i> | 105.4 (8.2) A  | 94.6 (8.8) C  |
|                                      | <i>OSCPK5_E4</i> | 90.1 (7.2) A   | 81.4 (3.2) A  |
|                                      | <i>OSCPK5_E7</i> | 102.8 (8.6) A  | 87.9 (6.0) B  |
|                                      | NGM              | 105.6 (11.5) A | 94.5 (5.1) C  |
| Tiller Number                        | <i>OSCPK5_E2</i> | 40.3 (5.6) A   | 42.5 (7.2) A  |
|                                      | <i>OSCPK5_E4</i> | 41.5 (9.3) A   | 45.3 (4.2) A  |
|                                      | <i>OSCPK5_E7</i> | 36.3 (3.5) A   | 44.0 (7.4) A  |
|                                      | NGM              | 46.8 (2.5) A   | 45.8 (7.1) A  |
| Panicle Number                       | <i>OSCPK5_E2</i> | 40.3 (5.9) A   | 41.3 (7.2) A  |
|                                      | <i>OSCPK5_E4</i> | 41.5 (9.3) A   | 43.8 (4.2) A  |
|                                      | <i>OSCPK5_E7</i> | 36.3 (3.5) A   | 44.5 (7.1) A  |
|                                      | NGM              | 46.8 (2.5) A   | 45.0 (7.8) A  |
| Flag leaf width (cm)                 | <i>OSCPK5_E2</i> | 1.48 (0.2) A   | 1.51 (0.1) A  |
|                                      | <i>OSCPK5_E4</i> | 1.62 (0.1) A   | 1.54 (0.2) A  |
|                                      | <i>OSCPK5_E7</i> | 1.58 (0.1) A   | 1.58 (0.1) A  |
|                                      | NGM              | 1.51 (0.1) A   | 1.50 (0.1) A  |
| Flag leaf length (mm)                | <i>OSCPK5_E2</i> | 19.0 (3.5) A   | 17.4 (2.1) A  |

|                  |              |              |
|------------------|--------------|--------------|
| <i>OSCPK5_E4</i> | 18.6 (2.7) A | 17.4 (2.3) A |
| <i>OSCPK5_E7</i> | 18.6 (1.5) A | 17.4 (2.1) A |
| <i>NGM</i>       | 17.1 (1.5) A | 19.5 (3.6) A |

---

Uppercase letters indicate a comparison between *OSCPK5\_E4* (genetically modified) and *OSCPK5\_E4* (not genetically modified) plants for the same treatment (Scott-Knott test at 5% probability and n = 4). In parentheses: Standard deviation values.
